# Supplementary material
Source: PubMed Central journal article supplement (PMC5383554)
Supplement: mmc1.pdf [file mmc1.pdf]

**YMTHE, Volume 25**

## **Supplemental Information**

### **Safe Recombinant Outer Membrane**

### **Vesicles that Display M2e Elicit**

### **Heterologous Influenza Protection**

**Hannah C. Watkins, C. Garrett Rappazzo, Jaclyn S. Higgins, Xiangjie Sun, Nicole Brock, Annie Chau, Aditya Misra, Joseph P.B. Cannizzo, Michael R. King, Taronna R. Maines, Cynthia A. Leifer, Gary R. Whittaker, Matthew P. DeLisa, and David Putnam**

## SUPPLEMENTAL INFORMATION

### **Safe recombinant outer membrane vesicles that display M2e elicit heterologous influenza protection**

**Authors:** Hannah C. Watkins<sup>1</sup>, C. Garrett Rappazzo<sup>1</sup>, Jaclyn S. Higgins<sup>2</sup>, Xiangjie Sun<sup>3</sup>, Nicole Brock<sup>3</sup>, Annie Chau<sup>2</sup>, Aditya Misra<sup>4</sup>, Joseph P. B. Cannizzo<sup>5</sup>, Michael R. King<sup>1</sup>, Taronna R. Maines<sup>3</sup>, Cynthia A. Leifer<sup>6</sup>, Gary R. Whittaker<sup>6</sup>, Matthew P. DeLisa<sup>4</sup>, David Putnam<sup>1,4</sup>

<sup>1</sup>Meinig School of Biomedical Engineering, Cornell University, Ithaca, New York, USA

<sup>2</sup>Department of Biological and Environmental Engineering, Cornell University, Ithaca, New York, USA

<sup>3</sup>Influenza Division, National Center for Immunization and Respiratory Diseases, Centers for Disease Control and Prevention, Atlanta, GA 30333, USA.

<sup>4</sup>Smith School of Chemical and Biomolecular Engineering, Cornell University, Ithaca, New York, USA

<sup>5</sup>College of Agriculture and Life Sciences, Cornell University, Ithaca, New York, USA

<sup>6</sup>Department of Microbiology and Immunology, Cornell University College of Veterinary Medicine, Ithaca, New York, USA

**Table S1:** Primers used for PCR

| Primer         | Sequence (5'- 3')        | Source                  |
|----------------|--------------------------|-------------------------|
| <i>gutQ</i> -F | GTCGATAAGCTGATTACCGACGC  | Mamat 2015 <sup>1</sup> |
| <i>gutQ</i> -R | GTGAAACTATTCGTCAGGCACTGG | Mamat 2015 <sup>1</sup> |
| <i>nlpI</i> -F | ATTACGCCGCGCATGTGTTTAG   | This paper              |
| <i>nlpI</i> -R | AGGGCCGTATCCGTCTGAGC     | This paper              |

1. Mamat, U, Wilke, K, Bramhill, D, Schromm, AB, Lindner, B, Kohl, TA, *et al.* (2015). Detoxifying *Escherichia coli* for endotoxin-free production of recombinant proteins. *Microb. Cell Fact.* **14**: 1–15.

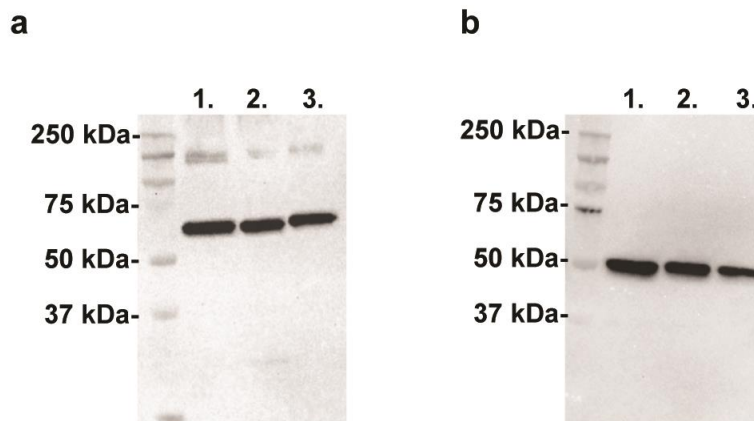

**Figure S1:** (a) Western blot of rOMVs expressing ClyA-GFP developed using anti-GFP antibody. Lane 1: ClyA-GFP CC rOMVs (2  $\mu$ g), lane 2: ClyA-GFP BL21 rOMVs (2  $\mu$ g), lane 3: ClyA-GFP purified protein (0.125  $\mu$ g). (b) Western blot of rOMVs expressing influenza-based antigen ClyA-M2e4xHet developed using anti-His tag antibody. Lane 1: ClyA-M2e4xHet CC rOMVs (1  $\mu$ g), lane 2: ClyA-M2e4xHet Nsl rOMVs (1  $\mu$ g), lane 3: ClyA-M2e4xHet purified protein (0.2  $\mu$ g). Both blots developed using chemiluminescence and imaged with Bio-Rad ChemiDoc Touch Imaging System (Bio-Rad, Hercules, CA).

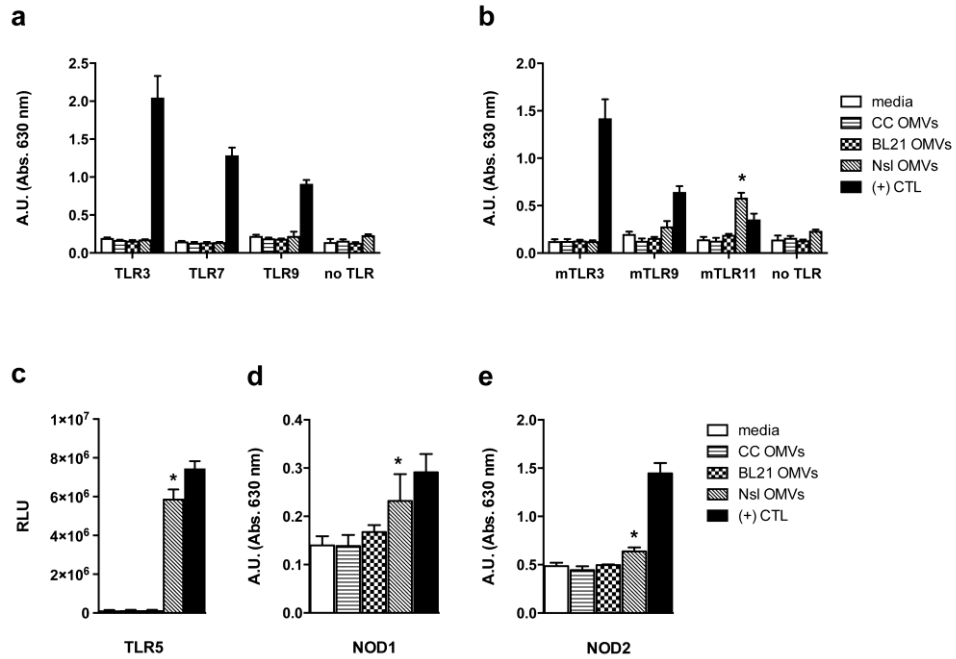

**Figure S2:** PRR signaling in response to rOMVs. **(a)** HEK-Blue™ KD-TLR5 cells were transfected with human TLR2, 3, 7, and 9, then stimulated with CC, Nsl, and BL21 rOMVs (100 ng/mL). **(b)** HEK-Blue™ KD-TLR5 cells were transfected with murine TLR2, 3, 9, and 11, then stimulated with CC, Nsl, and BL21 rOMVs (100 ng/mL). **(c)** HEK-293 cells were transfected with a 5xNF- $\kappa$ B-luciferase reporter plasmid and TLR5, then stimulated with CC, Nsl, and BL21 rOMVs (100 ng/mL). **(d, e)** HEK-293 Blue™ murine NOD1 **(d)** and NOD2 **(e)** reporter cells were stimulated with CC, Nsl, and BL21 rOMVs (100 ng/mL). Graphs analyzed using ANOVA followed by multiple comparisons to stimulation caused by media using Dunnett method of correction, \*  $p < 0.01$ . Error bars represent mean + SD (n=4).

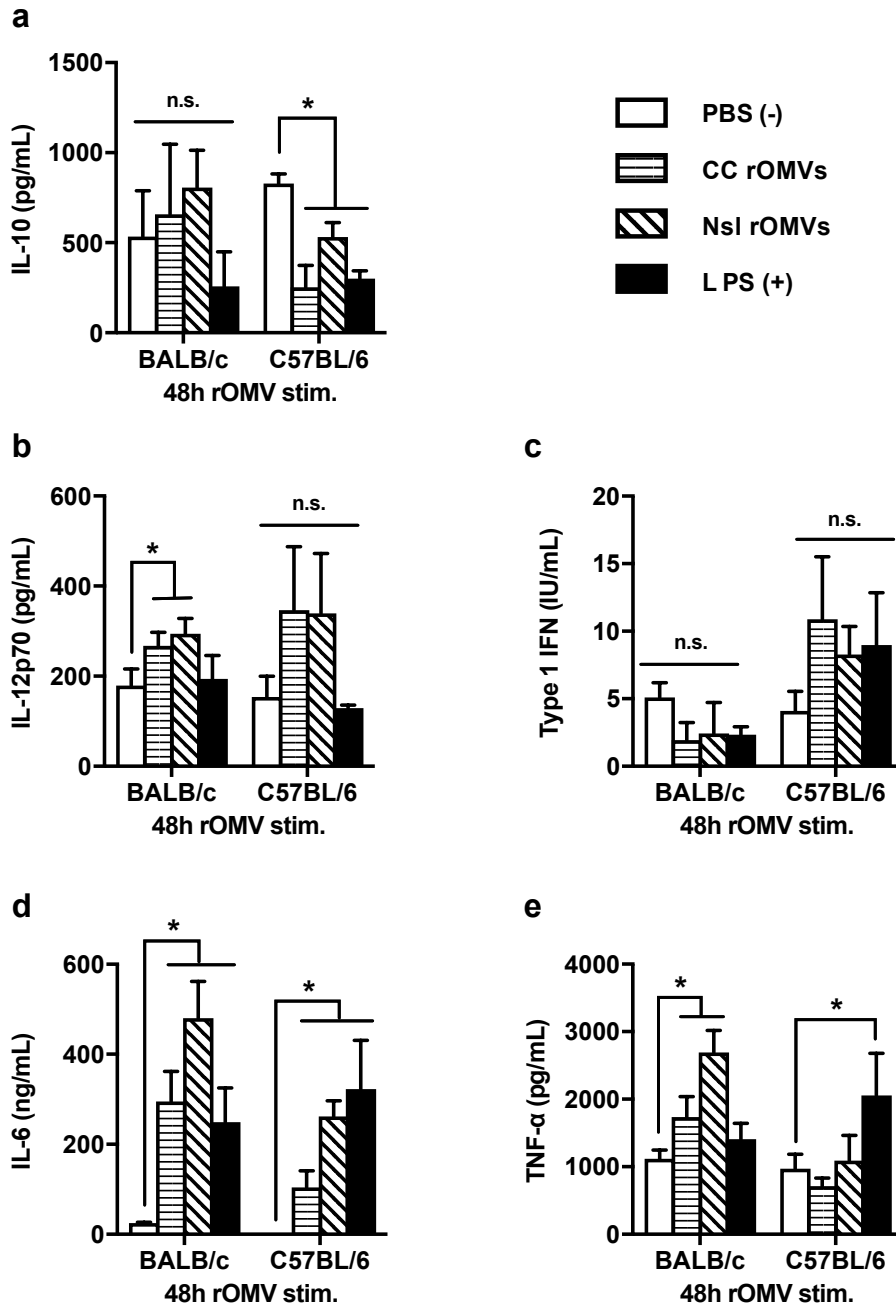

**S3:** BMDCs were isolated from BALB/c and C57BL/6 mice, then stimulated with CC rOMVs (100 ng/mL), Nsl rOMVs (100 ng/mL), LPS (100 ng/mL) or PBS. Media was collected 48h post stimulation and analyzed for IL-10 (a), IL-12p70 (b), type I IFN (c), IL-6 (d), and TNF- $\alpha$  (e). Error bars represent standard deviation. Samples analyzed via ANOVA followed by Holm multiple comparison test \*  $p < 0.05$  ( $n=3$ ).

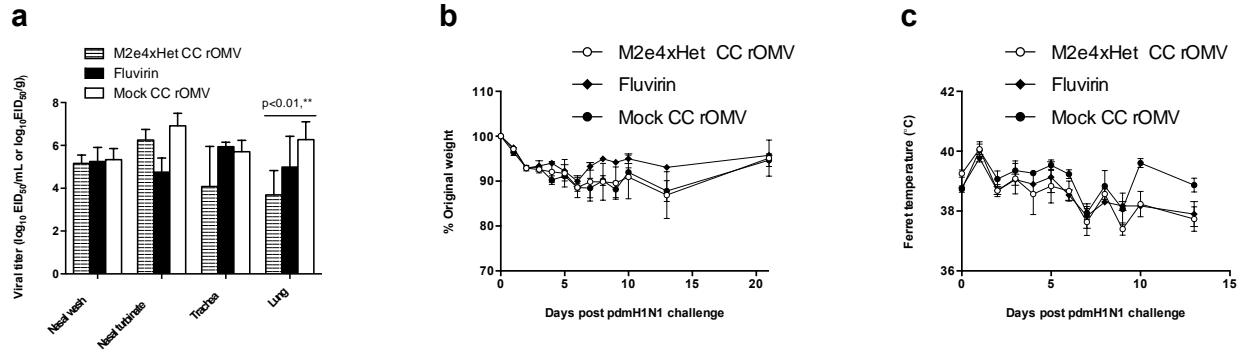

**Figure S4:** (a) Day 3 post influenza exposure, ferrets were assessed for viral titers. Groups analyzed with 2-way ANOVA, followed by multiple comparisons to mock CC rOMV using Bonferroni method of correction ( $n=3$ )  $** p < 0.01$ . (b,c) Weight loss (b) and temperature (c) were monitored in ferrets post influenza (pdmH1N1) exposure.
